# Supplementary material for: Ectopic Expression of Cold Responsive LlaCIPK Gene Enhances Cold Stress Tolerance in Nicotiana tabacum
Source: PubMed Central journal article supplement (PMC6627969; doi:10.3390/genes10060446), 2019-06-12
Supplement: genes-10-00446-s001.pdf [file genes-10-00446-s001.pdf]

**Supplementary Table S1: List of primers used in the study.**

| <b>Sl. No.</b> | <b>Name</b>        | <b>Sequence (5' to 3')</b> | <b>Length (mer)</b> |
|----------------|--------------------|----------------------------|---------------------|
| 1              | <i>Lla</i> CIPK F  | ATGGAGAAGAAAGGGTCTGT       | 20                  |
| 2              | <i>Lla</i> CIPK R  | TCAGTGCCAAGCCAATACAA       | 20                  |
| 3              | M13 F              | GCCAGGGTTTTCCAGTCACGA      | 22                  |
| 4              | M13 R              | GAGCGGATAACAATTCACACAGG    | 24                  |
| 5              | <i>Lla</i> CIPK F1 | GAGCGCTCTTGCTGACTCTA       | 20                  |
| 6              | <i>Lla</i> CIPK R3 | TGACCTCGGCTTTACCAATC       | 20                  |
| 7              | <i>Llar</i> RNA F  | GAGCGCTCTTGCTGACTCTA       | 20                  |
| 8              | <i>Llar</i> RNA R  | TGACCTCGGCTTTACCAATC       | 20                  |
|                |                    |                            |                     |

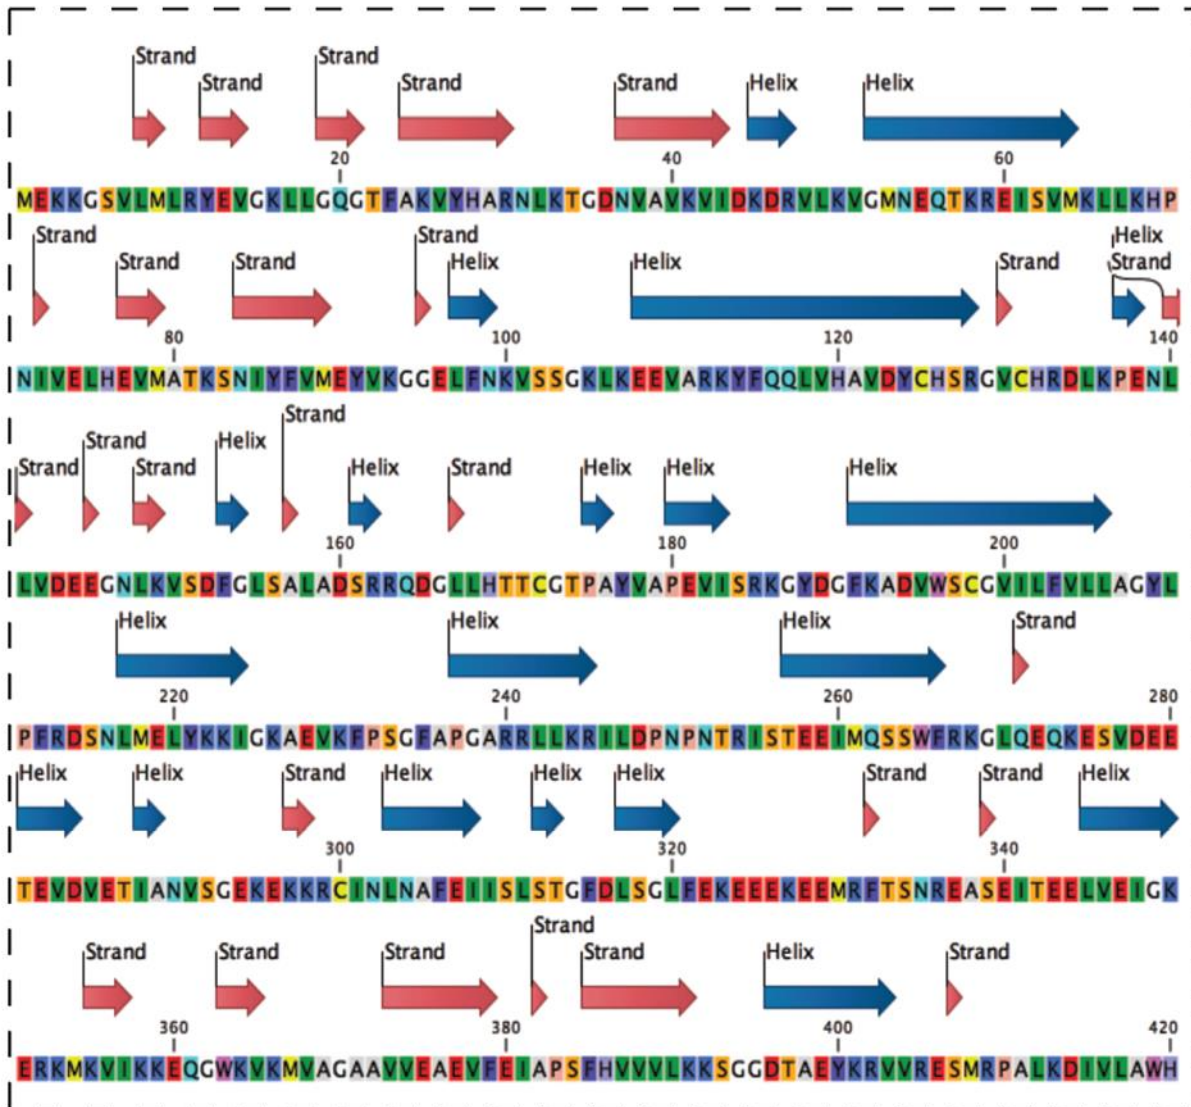

Supplementary Figure S1- Secondary structure of LlaCIPK protein.

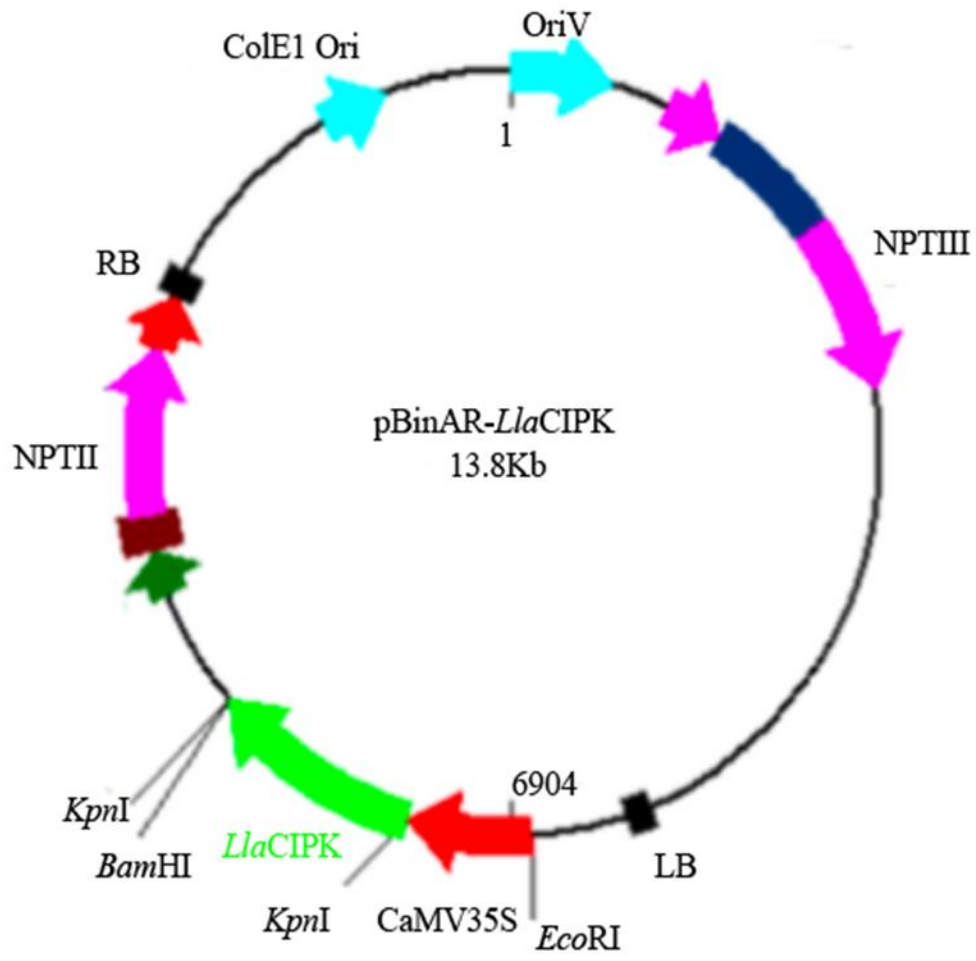

Supplementary Figure S2- pBinAR-CIPK vector map
